# Supplementary material for: Selenite Induces Cell Cycle Arrest and Apoptosis via Reactive Oxygen Species-Dependent Inhibition of the AKT/mTOR Pathway in Thyroid Cancer
Source: PubMed Central journal article supplement (PMC8176115; doi:10.3389/fonc.2021.668424), 2021-05-21
Supplement: DataSheet_1.pdf [file DataSheet_1.pdf]

## *Supplementary Material*

**Supplementary Table 1. Primers information**

| RT-PCR               |                         |
|----------------------|-------------------------|
| h-UQCRHL-F           | GACTGGAGGACGAGCAAAAG    |
| h-UQCRHL-R           | TCTCTCACTGTTGTTAGGGG    |
| h-NDUFS5-F           | TGCACATGGAATCGGTTATACTC |
| h-NDUFS5-R           | CCGAAGCAAACACTCTACGAAAT |
| h-NDUFA11-F          | GCCGAAGGTTTTTCGTCAGTA   |
| h-NDUFA11-R          | GGAGGATTGAGTGTGACTCTGT  |
| h-NDUFA1-F           | ATGTGGTTCGAGATTCTCCCC   |
| h-NDUFA1-R           | CCTGTGGATGTACGCAGTAGC   |
| h-NDUFB2-F           | GGAGGCCGCCTTTTCAGAA     |
| h-NDUFB2-R           | GGAAGGATCAGGATACGGAAAGT |
| h-NDUFB4-F           | ATGTCGTTCCCAAAGTATAAGCC |
| h-NDUFB4-R           | GAAGCAGGTACTCTCGTTTCAG  |
| h-NDUFA7-F           | TGCAGCTACGCTACCAGGA     |
| h-NDUFA7-R           | GAGCTTGTGGCTAGGACCC     |
| h-ATP5MC1-F          | CTGTTGTACCAGGGGTCTAATCA |
| h-ATP5MC1-R          | GTGGGAAGTTGCTGTAGGAAG   |
| h-COX7C-F            | GTGTCCTACTACAAGGAAGGGTG |
| h-COX7C-R            | GGTCCGTAGGAGCCACTATGA   |
| h-ATP5PD-F           | GCTGGGCGAAAACCTTGCTCTA  |
| h-ATP5PD-R           | CCAGTCGATAGCTGGTGGATT   |
| h-EIF4EBP3-F         | CGGTTACTTTGCTGCTCCTC    |
| h-EIF4EBP3-R         | GTGCGTCATCGGGTATCTCT    |
| h- $\beta$ -ACTIN -F | CATCACCATTGGCAATGAGC    |
| h- $\beta$ -ACTIN -R | GCCATGCCAATCTCATCTTG    |

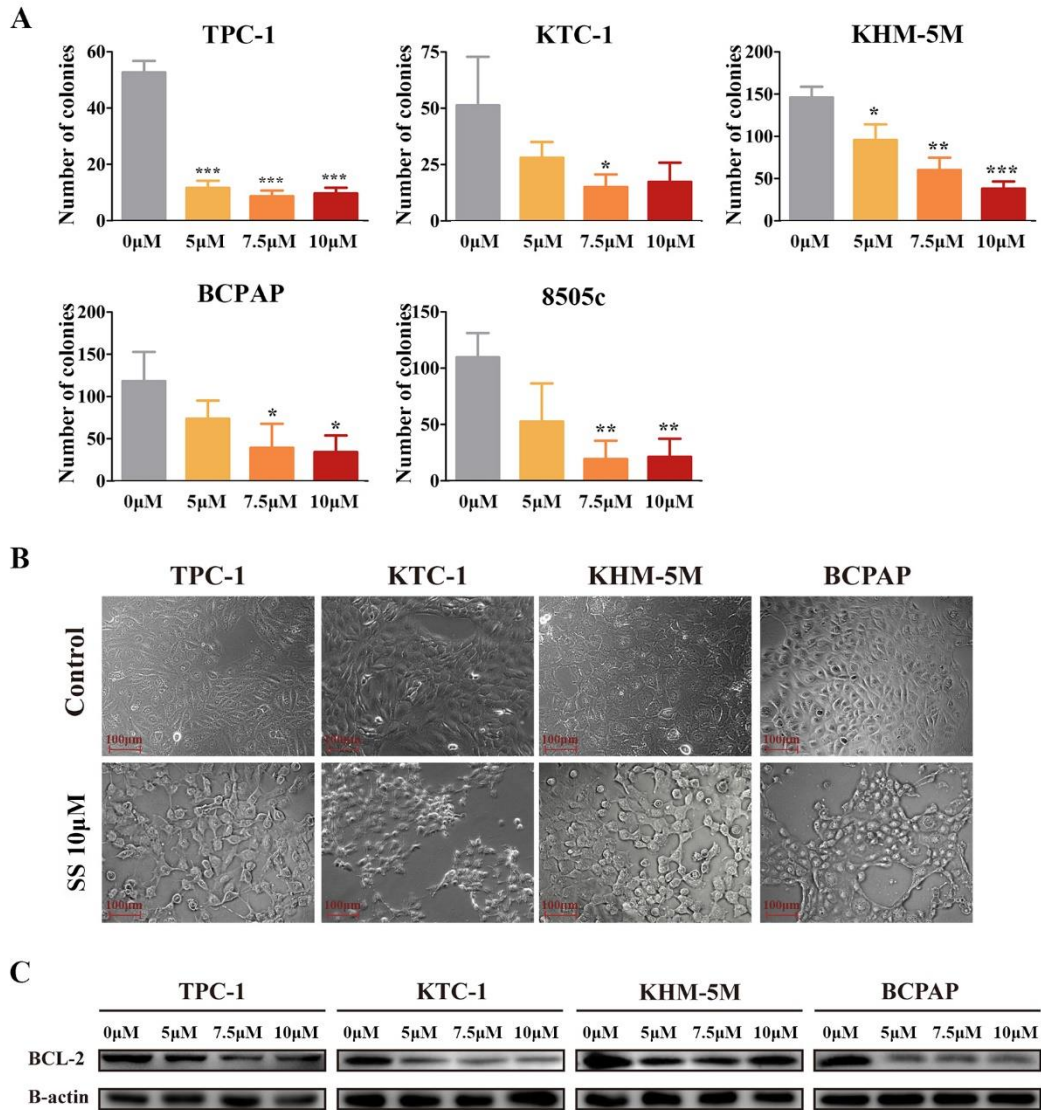

**Supplementary Figure 1.** SS induces thyroid cancer cell apoptosis. **(A)** The number of colonies in control and SS treatment groups. **(B)** Morphological changes of cancer cells were observed under microscope and **(C)** the protein levels of Bcl-2 were detected after treated with indicated concentration of selenite for 24 h. \* $P < 0.05$ ; \*\* $P < 0.01$ ; \*\*\* $P < 0.001$ . SS: Sodium selenite.

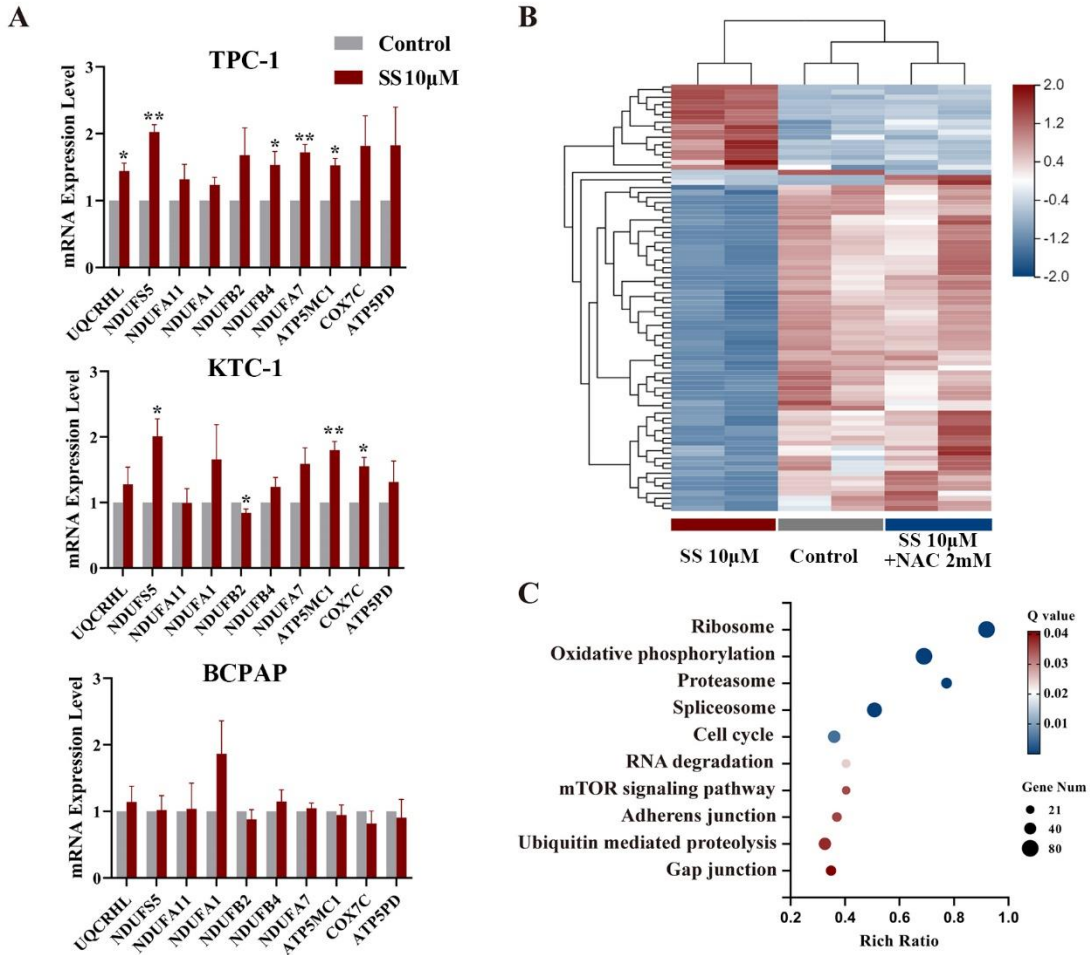

**Supplementary Figure 2.** Transcriptomic changes induced by SS. **(A)** Relative RNA expressions of top 10 genes enriched in oxidation phosphorylation pathway were validated by qRT-PCR in TPC-1, KTC-1 and BCPAP. **(B)** Hierarchical cluster analysis of differentially expressed genes in SS, control, and SS+NAC group. **(C)** Pathway enrichment analysis of differentially expressed genes between SS group and SS+NAC group. \* $P < 0.05$ ; \*\* $P < 0.01$ . SS: Sodium selenite. NAC: N-acetylcysteine.



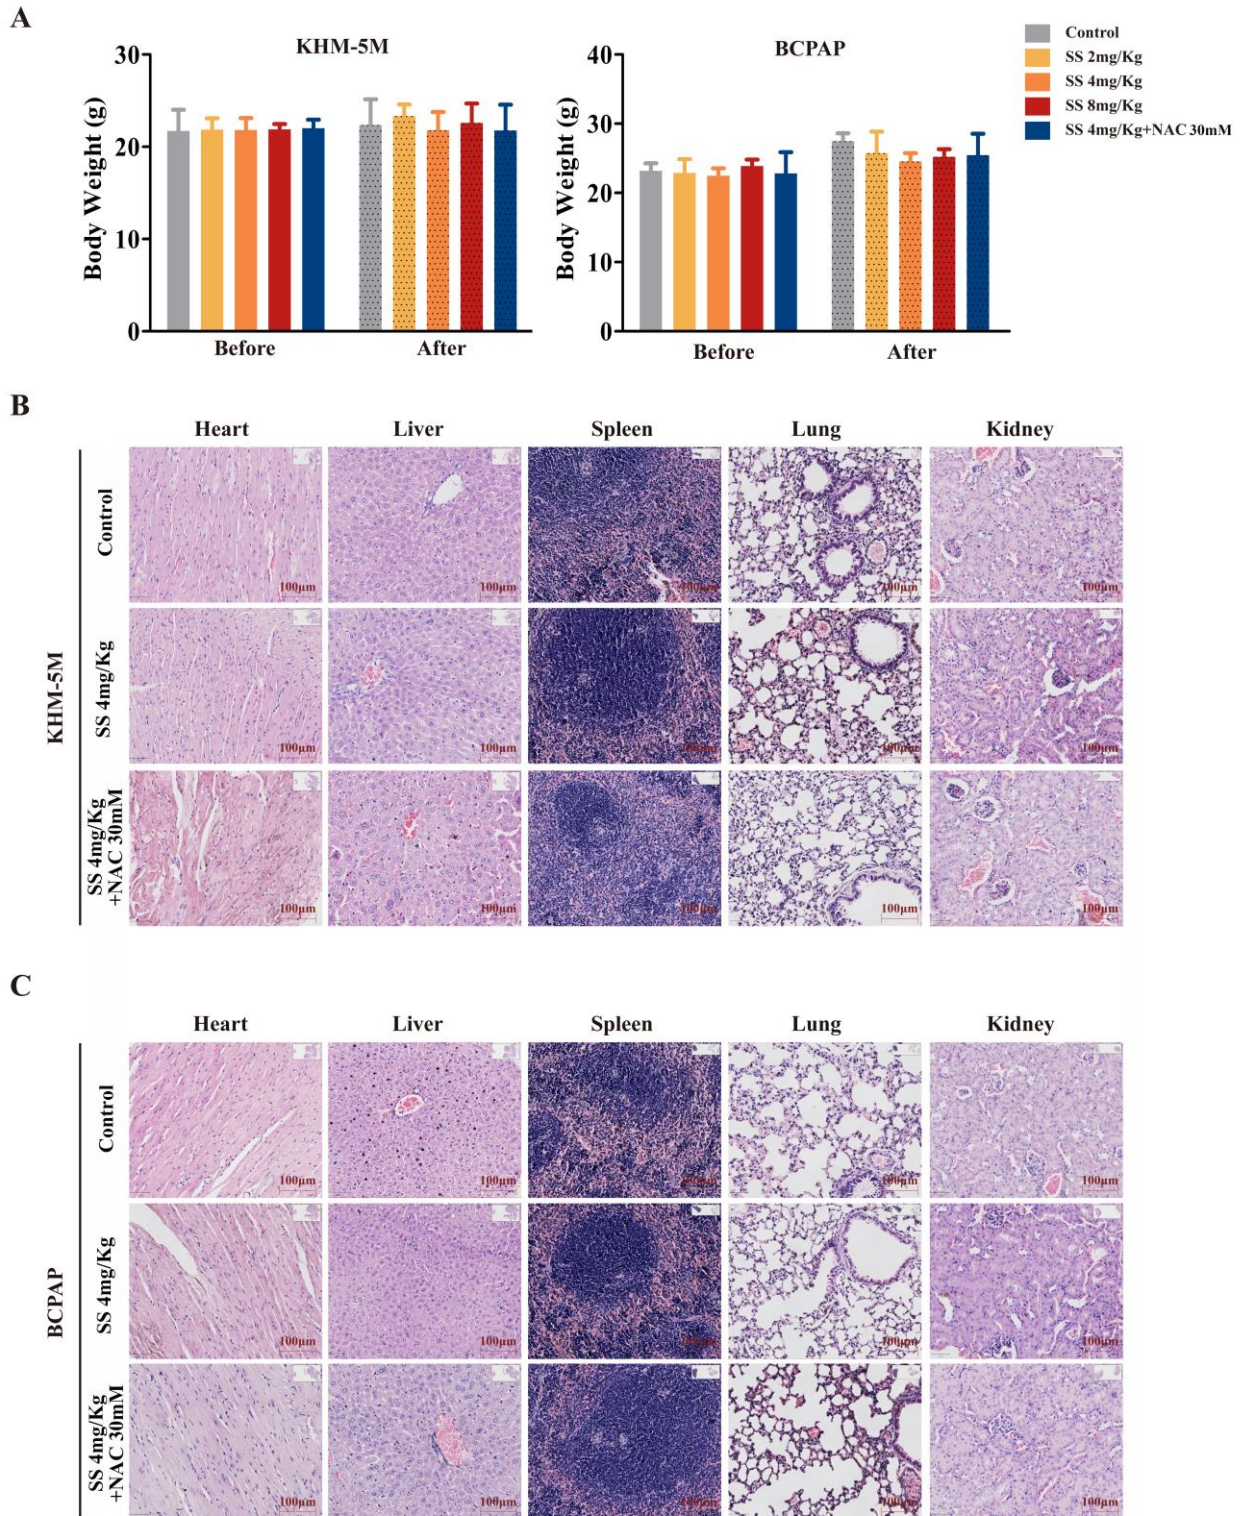

**Supplementary Figure 3.** Animal safety of sodium selenite treatment. (A) The body weights of mice in different groups before and after treatment. (B) HE staining of major organs of KHM-5M or (C) BCPAP xenografts mice after experiments. SS: Sodium selenite. NAC: N-acetylcysteine.

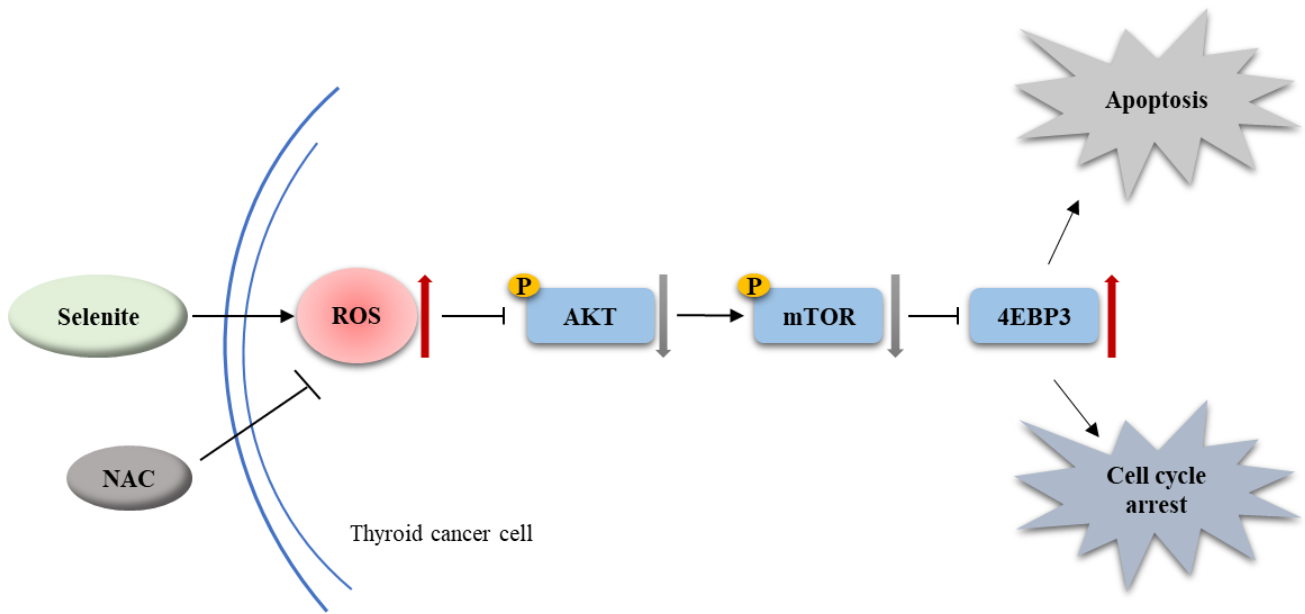

**Supplementary Figure 4.** Schematic picture to clarify the anticancer function of selenite in thyroid cancer cell.
